# Supplementary material for: Electronic properties of PbX3CH3NH3(X = Cl, Br, I) compounds for photovoltaic and photocatalytic applications
Source: Royal Society of Chemistry journal article supplement (doi:10.1039/c4cp04666h), 2014-11-26
Supplement: c4cp04666h1.pdf [file c4cp04666h1.pdf]

## SUPPLEMENTARY MATERIALS

to

### “Electronic properties of $\text{PbX}_3\text{CH}_3\text{NH}_3$ (X=Cl, Br, I) compounds for photovoltaic and photocatalytic applications”

Sigismund Teunis Alexander George Melissen<sup>1</sup>, Frédéric Labat<sup>2</sup>,  
Philippe Sautet<sup>1</sup>, Tangui Le Bahers\*<sup>1</sup>

<sup>1</sup> Université de Lyon, Université Claude Bernard Lyon1, ENS Lyon, Centre Nationale de Recherche Scientifique, 46 allée d'Italie, 69007 Lyon Cedex 07, France

<sup>2</sup>LECIME, Laboratoire d'Electrochimie, Chimie des Interfaces et Modélisation pour l'Energie, UMR 7575 CNRS, Ecole Nationale Supérieure de Chimie de Paris – Chimie ParisTech, 11 rue P. et M. Curie, 75231 Paris Cedex 05, France.

\*tangui.le\_bahers@ens-lyon.fr

#### Table of Contents

|                                                                                              |    |
|----------------------------------------------------------------------------------------------|----|
| 1. Computed cell parameters.....                                                             | 2  |
| 2. Data Bandgaps.....                                                                        | 3  |
| 3. Data infinit dielectric constant.....                                                     | 3  |
| 4. Data dielectric constant.....                                                             | 3  |
| 5. Data exciton binding energies.....                                                        | 3  |
| 6. Data effective masses.....                                                                | 4  |
| 8. Infra-red Spectroscopy.....                                                               | 5  |
| 9. Summary of values of the band gaps, exciton binding energies and dielectric constants.... | 6  |
| 10. Summary of effective masses.....                                                         | 7  |
| a. With Spin-Orbit-coupling:.....                                                            | 7  |
| b. Without Spin-Orbit-coupling:.....                                                         | 7  |
| 11. Geometry Optimizations.....                                                              | 8  |
| 12. References.....                                                                          | 12 |

## 1. Computed cell parameters.

|                 | PbCl <sub>3</sub> | Cub.<br><i>a</i> | PbBr <sub>3</sub> |                   | Cub.<br><i>a</i> | PbI <sub>3</sub>  |                   |
|-----------------|-------------------|------------------|-------------------|-------------------|------------------|-------------------|-------------------|
|                 | Cub.<br><i>a</i>  |                  | Tet.<br><i>a'</i> | Tet.<br><i>c'</i> |                  | Tet.<br><i>a'</i> | Tet.<br><i>c'</i> |
| <b>PBE</b>      | 5.722             | 6.024            | 8.402             | 12.097            | 6.441            | 8.983             | 12.845            |
| <b>PBE-D</b>    | 5.652             | 5.931            | 8.265             | 11.844            | 6.308            | 8.721             | 12.555            |
| <b>PBEsol</b>   | 5.624             | 5.903            | 8.222             | 11.830            | 6.294            | 8.767             | 12.562            |
| <b>PBEsol-D</b> | 5.551             | 5.808            | 8.057             | 11.689            | 6.164            | 8.523             | 12.276            |
| <b>B3PW91</b>   | 5.736             | 6.034            | 8.423             | 12.116            | 6.441            | 8.987             | 12.853            |
| <b>B3PW91-D</b> | 5.736             | 5.896            | 8.188             | 11.860            | 6.260            | 8.722             | 12.557            |
| <b>PBE0</b>     | 5.632             | 5.996            | 8.372             | 12.041            | 6.441            | 8.931             | 12.787            |
| <b>PBE0-D</b>   | 5.640             | 5.914            | 8.232             | 11.795            | 6.289            | 8.673             | 12.499            |
| <b>HSE</b>      | 5.702             | 5.994            | 8.393             | 11.988            | 6.408            | 8.898             | 12.923            |
| <b>HSED</b>     | 5.607             | 5.860            | 8.174             | 11.738            | 6.235            | 8.807             | 12.769            |
| <b>Exp</b>      | 5.675             | 5.901            | 8.322             | 11.833            | 6.328            | 8.856             | 12.660            |

Table S1. Computed cell parameters (using CRYSTAL14 code) using several functionals. Results highlighted in grey are obtained by including the D2 dispersion correction in the calculations. The chosen method is highlighted in dark grey.

## 2. Data Bandgaps.

| Method | Ref                                                                                  | PbCl <sub>3</sub> | PbBr <sub>3</sub> |      | PbI <sub>3</sub> |      |
|--------|--------------------------------------------------------------------------------------|-------------------|-------------------|------|------------------|------|
|        |                                                                                      | Cub.              | Cub.              | Tet. | Cub.             | Tet. |
| Exp    | Ishiharabat <i>et al.</i> <sup>1</sup><br>Papavissilion <i>et al.</i> <sup>2,3</sup> | 2.98              | 2.33              | 2.3  | 1.63             | 1.7  |
| LDA    | Even <i>et al.</i> <sup>4</sup>                                                      |                   |                   | 0.54 |                  | 0.98 |
| LDA    | Brivio <i>et al.</i> <sup>5</sup>                                                    |                   |                   |      | 1.46             |      |
| LDA-SO | Brivio <i>et al.</i> <sup>5</sup>                                                    |                   |                   |      | 0.53             |      |
| PBE    | Mosconi <i>et al.</i> <sup>6</sup>                                                   | 2.34              | 1.80              | 1.83 | 1.57             | 1.66 |
| PBE    | Giorgi <i>et al.</i> <sup>7</sup>                                                    |                   |                   |      | 1.64             |      |
| PBE-SO | Brivio <i>et al.</i> <sup>5</sup>                                                    |                   |                   |      | 0.52             |      |
| PBEsol | Brivio <i>et al.</i> <sup>5</sup>                                                    |                   |                   |      | 1.2              |      |
| HSE    | This work                                                                            | 2.81              | 2.31              | 2.56 | 1.89             | 2.10 |
| HSE-SO | This work                                                                            | 1.64              | 1.15              | 1.54 | 0.68             | 1.04 |
| GW     | Umari <i>et al.</i> <sup>8</sup>                                                     |                   |                   |      |                  | 2.68 |
| GW     | Brivio <i>et al.</i> <sup>5</sup>                                                    |                   |                   |      | 2.73             |      |
| GW-SO  | Umari <i>et al.</i> <sup>8</sup>                                                     |                   |                   |      |                  | 1.67 |
| GW-SO  | Brivio <i>et al.</i> <sup>5</sup>                                                    |                   |                   |      | 1.67             |      |

Table S2. Data used to draw the Figure 3.

## 3. Data infinit dielectric constant.

| Method | Ref                                 | PbCl <sub>3</sub> | PbBr <sub>3</sub> |      | PbI <sub>3</sub> |      |
|--------|-------------------------------------|-------------------|-------------------|------|------------------|------|
|        |                                     | Cub.              | Cub.              | Tet. | Cub.             | Tet. |
| Exp    | Hirasawa <i>et al.</i> <sup>9</sup> |                   | 4.8               |      | 6.5              |      |
| PBE-SO | Umari <i>et al.</i> <sup>8</sup>    |                   |                   |      |                  | 5.6  |
| PBEsol | Brivio <i>et al.</i> <sup>10</sup>  |                   |                   |      | 6.2              |      |
| PBEsol | Brivio <i>et al.</i> <sup>5</sup>   |                   |                   |      | 6.1              |      |
| HSE    | This work                           | 3.52              | 4.05              | 4.07 | 5.13             | 5.00 |
| HSE-SO | This work                           | 3.78              | 4.37              | 4.36 | 5.82             | 5.62 |
| GW-SO  | Umari <i>et al.</i> <sup>8</sup>    |                   |                   |      |                  | 7.1  |
| GW-SO  | Brivio <i>et al.</i> <sup>5</sup>   |                   |                   |      | 4.5              |      |

Table S3. Data used to draw the Figure 4.

## 4. Data dielectric constant.

| Method                    | Ref                                   | PbCl <sub>3</sub> | PbBr <sub>3</sub> |      | PbI <sub>3</sub> |      |
|---------------------------|---------------------------------------|-------------------|-------------------|------|------------------|------|
|                           |                                       | Cub.              | Cub.              | Tet. | Cub.             | Tet. |
| Exp                       | Poglitsch <i>et al.</i> <sup>11</sup> | 23.9              | 25.5              |      | 28.8             |      |
| PBEsol                    | Brivio <i>et al.</i> <sup>10</sup>    |                   |                   |      | 24.9             |      |
| PBEsol                    | Brivio <i>et al.</i> <sup>5</sup>     |                   |                   |      | 25.7             |      |
| HSE-PBE <sub>0D2</sub>    | This work                             | 12.1              | 13.9              | 15.4 | 17.1             | 17.1 |
| HSE-SO-PBE <sub>0D2</sub> | This work                             | 12.4              | 14.2              | 15.7 | 17.8             | 17.7 |

Table S4. Data used to draw the Figure 5.

## 5. Data exciton binding energies.

| Method | Ref                                 | PbCl <sub>3</sub> | PbBr <sub>3</sub> |      | PbI <sub>3</sub> |      |
|--------|-------------------------------------|-------------------|-------------------|------|------------------|------|
|        |                                     | Cub.              | Cub.              | Tet. | Cub.             | Tet. |
| Exp    | Tanaka <i>et al.</i>                |                   |                   | 76   |                  | 50   |
| Exp    | Hirasawa <i>et al.</i> <sup>9</sup> |                   |                   |      |                  | 37   |
| Hückel |                                     |                   |                   |      |                  | 29   |

|                           |           |       |       |       |      |      |
|---------------------------|-----------|-------|-------|-------|------|------|
| HSE- $\epsilon_r$         | This work | 9.6   | 6.2   | 8.9   | 3.4  | 6.8  |
| HSE- $\epsilon_\infty$    | This work | 114.8 | 72.3  | 127.9 | 37.2 | 79.3 |
| HSE-SO- $\epsilon_r$      | This work | 15.5  | 10.1  | 7.7   | 5.5  | 3.9  |
| HSE-SO- $\epsilon_\infty$ | This work | 166.2 | 107.5 | 100.8 | 50.9 | 39.1 |

Table S5. Data used to draw the Figure 7.

## 6. Data effective masses.

| Method | Ref                               | PbCl <sub>3</sub> |         | PbBr <sub>3</sub> |         |         |         | PbI <sub>3</sub> |         |         |         |
|--------|-----------------------------------|-------------------|---------|-------------------|---------|---------|---------|------------------|---------|---------|---------|
|        |                                   | Cub.              |         | Cub.              |         | Tet.    |         | Cub.             |         | Tet.    |         |
|        |                                   | $m_e^*$           | $m_h^*$ | $m_e^*$           | $m_h^*$ | $m_e^*$ | $m_h^*$ | $m_e^*$          | $m_h^*$ | $m_e^*$ | $m_h^*$ |
| PBE    | Umari <i>et al.</i> <sup>8</sup>  |                   |         |                   |         |         |         |                  |         | 0.35    | 0.45    |
| PBE-SO | Umari <i>et al.</i> <sup>8</sup>  |                   |         |                   |         |         |         |                  |         | 0.26    | 0.16    |
| HSE    | This work                         | 0.19              | 0.25    | 0.16              | 0.19    | 0.39    | 0.26    | 0.13             | 0.17    | 0.31    | 0.27    |
| HSE-SO | This work                         | 0.36              | 0.34    | 0.29              | 0.31    | 0.28    | 0.28    | 0.22             | 0.29    | 0.17    | 0.19    |
| GW-SO  | Umari <i>et al.</i> <sup>8</sup>  |                   |         |                   |         |         |         |                  |         | 0.18    | 0.24    |
| GW-SO  | Brivio <i>et al.</i> <sup>5</sup> |                   |         |                   |         |         |         | 0.15             | 0.12    |         |         |

Table S6. Data used to draw the Figure 8.

## 8. Infra-red Spectroscopy.

| PbCl <sub>3</sub>            |            | PbBr <sub>3</sub>            |            |                              |            |                              |            | PbI <sub>3</sub>             |            |                              |            |                              |            |
|------------------------------|------------|------------------------------|------------|------------------------------|------------|------------------------------|------------|------------------------------|------------|------------------------------|------------|------------------------------|------------|
| Cub.                         |            | Cub.                         |            | Tet.                         |            |                              |            | Cub.                         |            | Tet.                         |            |                              |            |
| $\bar{\nu} / \text{cm}^{-1}$ | Int / a.u. |
| 55.5                         | 8.47       | 29.6                         | 7.79       | 6.6                          | 0.07       | 303.4                        | 19.92      | 20.0                         | 3.83       | 14.1                         | 0.00       | 301.9                        | 0.15       |
| 61.7                         | 23.86      | 36.2                         | 2.95       | 12.1                         | 0.01       | 307.5                        | 0.97       | 29.3                         | 5.40       | 16.9                         | 0.00       | 308.3                        | 6.34       |
| 64.2                         | 3.73       | 41.2                         | 12.80      | 27.2                         | 0.03       | 912.5                        | 459.20     | 32.4                         | 3.79       | 22.1                         | 0.06       | 912.1                        | 345.62     |
| 64.2                         | 20.95      | 41.9                         | 3.60       | 28.6                         | 0.79       | 913.7                        | 0.14       | 34.4                         | 10.50      | 24.1                         | 0.02       | 915.9                        | 10.89      |
| 78.4                         | 38.97      | 47.9                         | 5.00       | 31.7                         | 0.50       | 920.5                        | 13.25      | 38.8                         | 19.25      | 27.0                         | 0.02       | 916.2                        | 2.35       |
| 95.0                         | 14.33      | 53.7                         | 18.61      | 35.3                         | 0.02       | 922.1                        | 0.51       | 40.4                         | 34.52      | 27.9                         | 0.17       | 917.2                        | 3.64       |
| 97.0                         | 11.65      | 84.8                         | 52.38      | 39.1                         | 28.15      | 933.5                        | 97.15      | 54.8                         | 13.75      | 28.6                         | 6.11       | 928.6                        | 52.79      |
| 109.7                        | 18.48      | 87.2                         | 207.00     | 39.3                         | 32.14      | 935.0                        | 224.41     | 65.4                         | 38.70      | 28.8                         | 108.11     | 929.6                        | 34.05      |
| 112.3                        | 201.14     | 90.2                         | 25.50      | 40.2                         | 0.03       | 935.5                        | 86.32      | 73.3                         | 110.77     | 29.8                         | 160.93     | 930.4                        | 59.31      |
| 120.7                        | 250.00     | 100.5                        | 201.77     | 44.4                         | 28.14      | 936.5                        | 18.71      | 75.4                         | 164.47     | 33.2                         | 77.01      | 931.9                        | 5.54       |
| 145.1                        | 244.14     | 106.1                        | 195.46     | 44.8                         | 13.70      | 1024.1                       | 5.79       | 83.7                         | 191.04     | 36.7                         | 40.96      | 1017.8                       | 0.02       |
| 164.1                        | 385.92     | 114.8                        | 40.03      | 45.5                         | 42.96      | 1024.4                       | 26.50      | 95.9                         | 138.23     | 37.1                         | 0.79       | 1017.9                       | 34.83      |
| 173.6                        | 60.54      | 124.6                        | 49.25      | 48.5                         | 45.32      | 1025.2                       | 30.27      | 100.0                        | 3.82       | 38.3                         | 1.16       | 1018.5                       | 0.00       |
| 185.4                        | 105.73     | 138.4                        | 77.64      | 49.3                         | 0.20       | 1025.6                       | 4.20       | 113.4                        | 49.25      | 39.5                         | 19.06      | 1018.7                       | 25.00      |
| 187.4                        | 84.72      | 143.5                        | 91.23      | 52.4                         | 6.85       | 1281.6                       | 150.24     | 118.4                        | 92.12      | 40.1                         | 8.52       | 1275.1                       | 0.06       |
| 341.4                        | 0.65       | 330.3                        | 1.24       | 52.9                         | 1.87       | 1282.7                       | 0.55       | 303.2                        | 9.65       | 41.8                         | 0.08       | 1276.8                       | 0.10       |
| 934.0                        | 39.85      | 922.9                        | 49.98      | 53.6                         | 4.05       | 1283.8                       | 0.45       | 920.1                        | 112.21     | 43.1                         | 0.24       | 1277.6                       | 0.04       |
| 962.1                        | 35.33      | 947.9                        | 36.73      | 57.6                         | 18.30      | 1284.2                       | 0.05       | 930.8                        | 31.26      | 44.3                         | 0.38       | 1279.1                       | 34.91      |
| 1043.6                       | 15.31      | 1026.9                       | 14.39      | 57.8                         | 54.30      | 1289.4                       | 0.30       | 1013.0                       | 11.43      | 45.2                         | 4.39       | 1288.4                       | 9.19       |
| 1290.5                       | 15.45      | 1283.9                       | 14.87      | 58.2                         | 11.57      | 1290.0                       | 0.61       | 1282.8                       | 22.19      | 46.3                         | 0.16       | 1289.1                       | 20.95      |
| 1300.0                       | 7.72       | 1293.5                       | 7.57       | 58.5                         | 3.53       | 1290.7                       | 22.10      | 1286.9                       | 10.45      | 48.0                         | 0.01       | 1289.9                       | 29.16      |
| 1449.1                       | 29.75      | 1450.6                       | 23.14      | 60.9                         | 1.55       | 1291.1                       | 20.75      | 1453.0                       | 18.97      | 49.0                         | 1.05       | 1291.0                       | 8.79       |
| 1499.2                       | 35.70      | 1495.9                       | 32.71      | 63.3                         | 7.15       | 1447.4                       | 0.07       | 1493.5                       | 40.52      | 49.8                         | 266.10     | 1448.2                       | 0.71       |
| 1511.2                       | 8.99       | 1503.7                       | 14.46      | 65.0                         | 0.12       | 1448.1                       | 40.68      | 1496.5                       | 35.49      | 50.1                         | 1.47       | 1448.3                       | 94.29      |
| 1569.5                       | 182.89     | 1552.1                       | 173.50     | 65.3                         | 451.14     | 1448.3                       | 48.50      | 1540.2                       | 211.28     | 50.3                         | 3.36       | 1448.6                       | 18.18      |
| 1646.2                       | 117.89     | 1637.3                       | 141.15     | 68.1                         | 34.54      | 1448.8                       | 0.10       | 1634.2                       | 148.08     | 51.8                         | 10.02      | 1449.0                       | 95.04      |
| 1647.1                       | 213.22     | 1652.8                       | 191.86     | 69.6                         | 0.23       | 1485.1                       | 1.33       | 1645.2                       | 200.54     | 53.3                         | 0.48       | 1494.2                       | 9.72       |
| 3098.7                       | 4.49       | 3093.9                       | 2.46       | 72.0                         | 2.39       | 1486.1                       | 0.13       | 3083.5                       | 1.50       | 57.0                         | 1.44       | 1495.1                       | 19.86      |
| 3214.4                       | 4.49       | 3207.8                       | 3.66       | 74.1                         | 6.09       | 1487.9                       | 162.68     | 3199.0                       | 2.87       | 58.7                         | 32.95      | 1495.6                       | 14.58      |
| 3222.1                       | 2.12       | 3217.8                       | 1.94       | 76.1                         | 2.17       | 1488.8                       | 0.05       | 3208.2                       | 0.60       | 61.3                         | 640.84     | 1495.9                       | 31.30      |
| 3297.6                       | 562.35     | 3293.6                       | 545.62     | 79.1                         | 121.69     | 1494.4                       | 112.36     | 3319.3                       | 506.53     | 63.7                         | 14.61      | 1498.5                       | 101.65     |
| 3332.3                       | 1210.39    | 3340.4                       | 1113.54    | 84.1                         | 189.68     | 1494.5                       | 27.89      | 3388.7                       | 808.83     | 65.3                         | 319.18     | 1498.7                       | 13.46      |
| 3448.7                       | 385.35     | 3464.7                       | 301.75     | 87.5                         | 4.80       | 1499.0                       | 0.50       | 3438.8                       | 504.26     | 65.5                         | 61.30      | 1499.6                       | 1.81       |
|                              |            |                              |            | 88.4                         | 731.38     | 1499.7                       | 137.47     |                              |            | 67.4                         | 519.05     | 1500.6                       | 5.20       |
|                              |            |                              |            | 90.0                         | 157.25     | 1526.6                       | 0.91       |                              |            | 68.5                         | 49.52      | 1525.6                       | 11.47      |
|                              |            |                              |            | 92.8                         | 4.88       | 1529.8                       | 146.50     |                              |            | 69.0                         | 57.09      | 1527.3                       | 314.83     |
|                              |            |                              |            | 93.2                         | 1.63       | 1533.3                       | 312.43     |                              |            | 74.2                         | 4.19       | 1533.7                       | 229.16     |
|                              |            |                              |            | 95.0                         | 31.77      | 1535.5                       | 3.15       |                              |            | 76.3                         | 2.43       | 1534.6                       | 127.16     |
|                              |            |                              |            | 95.5                         | 496.61     | 1621.0                       | 106.84     |                              |            | 78.6                         | 52.05      | 1623.3                       | 52.67      |
|                              |            |                              |            | 98.1                         | 26.28      | 1623.0                       | 1.08       |                              |            | 79.1                         | 53.54      | 1625.9                       | 566.05     |
|                              |            |                              |            | 98.8                         | 48.66      | 1628.7                       | 0.62       |                              |            | 80.1                         | 2.13       | 1627.5                       | 432.63     |

|  |  |       |        |        |         |  |  |       |        |        |         |
|--|--|-------|--------|--------|---------|--|--|-------|--------|--------|---------|
|  |  | 99.8  | 36.19  | 1630.7 | 80.86   |  |  | 81.1  | 0.01   | 1630.1 | 468.63  |
|  |  | 102.2 | 31.64  | 1637.4 | 503.21  |  |  | 81.6  | 15.99  | 1635.4 | 324.11  |
|  |  | 102.4 | 52.11  | 1641.6 | 1.90    |  |  | 88.2  | 16.16  | 1638.4 | 12.61   |
|  |  | 103.6 | 69.91  | 1648.6 | 0.04    |  |  | 88.8  | 5.31   | 1641.4 | 9.10    |
|  |  | 108.3 | 55.93  | 1653.2 | 10.53   |  |  | 91.5  | 4.13   | 1644.9 | 96.40   |
|  |  | 110.1 | 3.87   | 3100.1 | 2.53    |  |  | 91.8  | 7.29   | 3086.9 | 0.94    |
|  |  | 118.7 | 44.93  | 3100.9 | 3.51    |  |  | 102.0 | 0.59   | 3087.1 | 1.24    |
|  |  | 119.4 | 25.16  | 3101.3 | 1.16    |  |  | 102.3 | 0.08   | 3090.6 | 1.42    |
|  |  | 120.8 | 1.04   | 3101.5 | 4.11    |  |  | 102.6 | 1.49   | 3091.7 | 1.27    |
|  |  | 121.3 | 0.58   | 3214.8 | 0.00    |  |  | 110.8 | 0.02   | 3203.0 | 2.08    |
|  |  | 134.0 | 40.29  | 3215.0 | 3.71    |  |  | 116.6 | 0.03   | 3203.4 | 1.79    |
|  |  | 134.8 | 0.05   | 3215.2 | 12.60   |  |  | 118.8 | 23.91  | 3203.5 | 1.55    |
|  |  | 138.8 | 1.17   | 3216.2 | 7.21    |  |  | 120.5 | 1.17   | 3203.9 | 1.62    |
|  |  | 145.7 | 1.00   | 3221.1 | 2.86    |  |  | 121.3 | 5.66   | 3208.6 | 2.68    |
|  |  | 146.3 | 0.08   | 3221.6 | 4.90    |  |  | 121.6 | 87.94  | 3209.0 | 2.37    |
|  |  | 149.0 | 0.54   | 3224.3 | 1.80    |  |  | 121.8 | 67.77  | 3218.1 | 1.61    |
|  |  | 151.0 | 131.31 | 3224.6 | 5.18    |  |  | 131.8 | 5.26   | 3220.2 | 1.79    |
|  |  | 155.9 | 0.65   | 3275.2 | 2158.08 |  |  | 133.3 | 2.45   | 3304.5 | 437.09  |
|  |  | 157.5 | 68.43  | 3276.5 | 1249.05 |  |  | 134.1 | 112.95 | 3305.5 | 279.86  |
|  |  | 158.2 | 4.98   | 3278.4 | 184.70  |  |  | 139.0 | 0.25   | 3310.4 | 517.51  |
|  |  | 159.7 | 115.29 | 3283.6 | 28.94   |  |  | 159.1 | 29.25  | 3311.1 | 1231.46 |
|  |  | 161.1 | 0.19   | 3391.9 | 646.10  |  |  | 160.1 | 52.06  | 3365.5 | 1012.61 |
|  |  | 165.6 | 0.04   | 3394.0 | 416.77  |  |  | 161.6 | 53.66  | 3371.0 | 792.44  |
|  |  | 167.3 | 5.45   | 3398.6 | 1325.41 |  |  | 164.8 | 2.34   | 3383.6 | 1660.40 |
|  |  | 186.2 | 575.40 | 3401.1 | 844.43  |  |  | 173.2 | 209.63 | 3385.7 | 319.53  |
|  |  | 188.6 | 36.21  | 3430.4 | 974.53  |  |  | 175.2 | 53.47  | 3428.8 | 166.29  |
|  |  | 190.7 | 1.07   | 3433.4 | 335.26  |  |  | 177.7 | 69.66  | 3430.1 | 180.67  |
|  |  | 203.6 | 0.01   | 3438.8 | 292.31  |  |  | 178.2 | 10.56  | 3433.8 | 1595.65 |
|  |  | 296.8 | 10.25  | 3441.3 | 389.62  |  |  | 299.6 | 19.78  | 3437.6 | 16.97   |
|  |  | 300.7 | 3.63   |        |         |  |  | 301.2 | 6.30   |        |         |

Table S7. Computed IR frequencies and intensities (on the PBE0-D geometries). Values with  $I^2/\tilde{\nu}^2 > 1$  are highlighted and correspond to the transitions strongly contributing to the vibrational term in the dielectric constant.

## 9. Summary of values of the band gaps, exciton binding energies and dielectric constants

|                          | $E_g$ (no SO) | $E_g$ (SO) | $E_b(\infty)$ | $E_b(r)$ | $\epsilon_\infty$ | $\epsilon_{vib}$ | $\epsilon_r$ |
|--------------------------|---------------|------------|---------------|----------|-------------------|------------------|--------------|
| PbCl <sub>3</sub> -c (R) | 2.81          | 1.64       | 99.3          | 9.2      | 3.79              | 8.6              | 12.1         |
| PbBr <sub>3</sub> -c (R) | 2.31          | 1.15       | 62.5          | 5.9      | 4.37              | 9.9              | 13.9         |
| PbI <sub>3</sub> -c (R)  | 1.88          | 0.68       | 28.6          | 3.1      | 5.85              | 12.0             | 17.1         |
| PbBr <sub>3</sub> -t (G) | 2.56          | 1.54       | 111.6         | 8.6      | 4.36              | 11.4             | 15.8         |
| PbI <sub>3</sub> -t (G)  | 2.10          | 1.04       | 62.6          | 6.3      | 5.62              | 12.1             | 17.7         |

## 10. Summary of effective masses

### a. With Spin-Orbit-coupling:

#### *Tetragonal phases*

| Direction   | I     |       | Br    |       |
|-------------|-------|-------|-------|-------|
|             | $h^+$ | $e^-$ | $h^+$ | $e^-$ |
| <b>100</b>  | 0.20  | 0.18  | 0.28  | 0.27  |
| <b>001</b>  | 0.18  | 0.13  | 0.35  | 0.37  |
| <b>110</b>  | 0.20  | 0.18  | 0.27  | 0.27  |
| <b>011</b>  | 0.20  | 0.24  | 0.25  | 0.24  |
| <b>111</b>  | 0.19  | 0.16  | 0.29  | 0.29  |
| $\bar{m}^*$ | 0.19  | 0.17  | 0.28  | 0.28  |

#### *Cubic phases*

| Direction   | I     |       | Br    |       | Cl    |       |
|-------------|-------|-------|-------|-------|-------|-------|
|             | $h^+$ | $e^-$ | $h^+$ | $e^-$ | $h^+$ | $e^-$ |
| <b>100</b>  | 0.29  | 0.23  | 0.34  | 0.29  | 0.37  | 0.36  |
| <b>110</b>  | 0.30  | 0.22  | 0.31  | 0.28  | 0.34  | 0.35  |
| <b>111</b>  | 0.29  | 0.24  | 0.30  | 0.30  | 0.33  | 0.37  |
| $\bar{m}^*$ | 0.29  | 0.23  | 0.31  | 0.29  | 0.35  | 0.36  |

### b. Without Spin-Orbit-coupling:

#### *Tetragonal phases*

| Direction   | I     |       | Br    |       |
|-------------|-------|-------|-------|-------|
|             | $h^+$ | $e^-$ | $h^+$ | $e^-$ |
| <b>100</b>  | 0.24  | 1.12  | 0.28  | 0.90  |
| <b>001</b>  | 0.42  | 0.16  | 0.37  | 0.28  |
| <b>110</b>  | 0.29  | 1.15  | 0.34  | 1.16  |
| <b>011</b>  | 0.22  | 0.21  | 0.24  | 0.25  |
| <b>111</b>  | 0.26  | 0.32  | 0.18  | 0.29  |
| $\bar{m}^*$ | 0.27  | 0.31  | 0.26  | 0.39  |

#### *Cubic phases*

| Direction   | I     |       | Br    |       | Cl    |       |
|-------------|-------|-------|-------|-------|-------|-------|
|             | $h^+$ | $e^-$ | $h^+$ | $e^-$ | $h^+$ | $e^-$ |
| <b>100</b>  | 0.18  | 0.09  | 0.20  | 0.12  | 0.24  | 0.14  |
| <b>110</b>  | 0.17  | 0.14  | 0.19  | 0.18  | 0.23  | 0.24  |
| <b>111</b>  | 0.16  | 0.20  | 0.18  | 0.22  | 0.21  | 0.27  |
| $\bar{m}^*$ | 0.17  | 0.13  | 0.19  | 0.16  | 0.23  | 0.20  |

## 11. Geometry Optimizations

The geometries of all structures ((c)ubic and (t)etragonal) are provided in this section. Lattice parameters are in Å, atomic positions are expressed relative to the lattice dimensions.

```
PbI3-c, constrained optimization
a=b=c 6.2887177267999999
Pb 0.0 0.0 0.0
I 0.5 0.0 0.0
I 0.0 0.5 0.0
I 0.0 0.0 0.5
N 0.4874524620054004 0.4940061548475967 0.6764940157680002
C 0.5314187159587007 0.5014580668713009 0.4442999829246972
H 0.3279499668270986 0.5116171663013986 0.7094820121784977
H 0.5667520886567985 0.6122178141067991 0.7570639838185969
H 0.5354349635685978 0.3515216315240011 0.7417592796736017
H 0.4659672075208974 0.6487549367892029 0.3800563606133025
H 0.4558479018761972 0.3637103772651002 0.3706797956764021
H 0.7031241123592977 0.4954237172940026 0.4205809092176978
```

```
PbI3-t, constrained optimization
a 8.7594521844 (a=b=8.759452)
b 8.7594524422
c 12.5965028
Pb 0.0 0.0 0.0
Pb 0.5 0.5 0.0
Pb 0.0 0.0 0.5
Pb 0.5 0.5 0.5 I 0.0 0.0 0.25
I 0.0 0.0 -0.25 I 0.5 0.5 0.25
I 0.5 0.5 -0.25
I 0.2106317239 -0.2893682761 1.74277805722871E-019
I -0.1806523254 0.3193476746 3.42728007729733E-020
I 0.3007524708 0.2007524708 1.41763902841986E-019
I -0.2989083449 -0.1989083449 2.27344383197057E-019
I -0.2860490432 0.2139509568 0.5000000003
I 0.3209227279 -0.1790772721 0.5000000003
I -0.1981316415 -0.2981316415 0.5000000003
I 0.2022018077 0.3022018077 0.5000000003
N 0.0838675659 0.4392904691 0.2161279149
N 0.4214542346 -0.0574143145 0.2125618639
N -0.0799582269 0.4418273764 -0.287463372
N -0.4147599262 -0.0544454598 -0.2863950697
C -0.0351525679 -0.4600814489 0.2623852347
C 0.4909029123 0.0639862746 0.2791115531
C -0.0099200926 -0.4375587423 -0.220568704
C 0.4889266377 0.0449431133 -0.2183032539
H 0.137152561 0.4924470706 0.153349416
H 0.1648467338 0.4122628717 0.272108407
H 0.0366037176 0.3400572362 0.1875755833
H -0.0890530338 0.4800302166 0.3282692687
H 0.0189852492 -0.3560284993 0.2914322034
H -0.1188345442 -0.4330304723 0.201074166
H 0.3786533726 -0.0108643044 0.1433880131
H 0.5000694733 -0.1393679529 0.1925474421
H 0.3322376138 -0.1086786043 0.2515516677
H -0.4635597968 0.0121069544 0.3509499342
H -0.4187670037 0.1199414424 0.2340068713
H 0.4024363748 0.146494248 0.2997406108
H -0.1221674008 0.4887615664 -0.3566683687
H -0.0017635369 0.3594371119 -0.3073757435
H -0.1697677456 0.3911410223 -0.2487182353
H 0.0349693249 -0.4901175095 -0.1487844566
H 0.0810615478 -0.3820704393 -0.2653100335
H -0.0978589398 -0.3545449563 -0.1998376659
H -0.3462044867 0.0109990764 -0.3348311938
H -0.3464835004 -0.1224877781 -0.2399774863
H -0.4817542556 -0.1220508566 -0.334573183
H 0.417518879 -0.0274873888 -0.1685592371
H -0.4364610871 0.1145108471 -0.1686377704
H 0.4187055714 0.1176164551 -0.2689083776
```

```
PbBr3-c, constrained optimization
a=b=c 0.591418218236E+01
```



```

Pb 0.0 0.0 0.0
Br -0.5 0.0 0.0
Br 0.0 -0.5 0.0
Br 0.0 0.0 -0.5
N 0.4763233 0.4914506 -0.3139409
C -0.4642825 0.4961150 0.4421872
H 0.3055355 -0.4866294 -0.2883953
H -0.4429436 -0.3827910 -0.2256062
H -0.4821039 0.3385629 -0.2415799
H 0.4718387 -0.3469639 0.3692842
H 0.4571486 0.3499914 0.3617244
H -0.2809593 0.4863351 0.4258766

```

```

PbBr3-t, constrained optimization
a=b=8.2320778
c=11.79492047

```

```

Pb 0.0 0.0 0.0
Pb -0.5 -0.5 0.0
Pb 0.0 0.0 -0.5
Pb -0.5 -0.5 -0.5
Br 0.0 0.0 0.25
Br 0.0 0.0 -0.25
Br -0.5 -0.5 0.25
Br -0.5 -0.5 -0.25
Br 0.22301217 -0.27698783 0.00000000
Br -0.18263739 0.31736261 0.00000000
Br 0.29599031 0.19599031 0.00000000
Br -0.30396357 -0.20396357 0.00000000
Br -0.27489204 0.22510796 -0.50000000
Br 0.32380009 -0.17619991 -0.50000000
Br -0.20228227 -0.30228227 -0.50000000
Br 0.19815152 0.29815152 -0.50000000
N 0.07886333 0.44980884 0.20121931
N 0.41095633 -0.05879313 0.21922723
N -0.08612997 0.44370013 -0.28821583
N -0.42625293 -0.07257512 -0.27060394
C -0.02402052 -0.46008718 0.28302198
C -0.48522838 0.05571415 0.28385675
C 0.01024893 -0.44693549 -0.21445950
C 0.46510431 0.07000121 -0.25676016
H 0.14177102 -0.47126020 0.14957322
H 0.16128913 0.37801719 0.24264084
H 0.00858528 0.37854587 0.14865149
H -0.09042993 0.45260141 0.33479058
H 0.05470582 -0.38664816 0.33682073
H -0.10813533 -0.38243586 0.23644737
H 0.34150122 0.00243723 0.16058250
H 0.47883826 -0.14252161 0.17563401
H 0.33460043 -0.11952833 0.27341765
H -0.40882136 -0.01423625 0.34121167
H -0.41167924 0.12614202 0.22478542
H 0.43590610 0.13567679 0.33297684
H -0.14929208 -0.49031873 -0.34813503
H -0.01335703 0.36416897 -0.33200734
H -0.16817242 0.37846860 -0.24136435
H 0.08111099 0.47912028 -0.15606226
H 0.08942085 -0.37250606 -0.26728982
H -0.07343486 -0.37020180 -0.16668945
H -0.31059036 -0.03782955 -0.29284096
H -0.41596313 -0.13706931 -0.19612296
H -0.47023883 -0.14851485 -0.33258119
H 0.34607572 0.02782086 -0.22908267
H -0.48268988 0.15050968 -0.19327045
H 0.45497267 0.13194159 -0.33810367

```

```

PbCl3-c, constrained optimization
a=b=c 0.563979292000E+01

```

Pb 0.0 0.0 0.0  
Cl -0.5 0.0 0.0  
Cl 0.0 -0.5 0.0  
Cl 0.0 0.0 -0.5  
N 0.468761 0.498906 -0.305443  
C -0.463504 0.498743 0.440873  
H 0.287677 -0.497966 -0.279820  
H -0.465780 -0.354885 -0.218087  
H -0.471200 0.349548 -0.219232  
H 0.467508 -0.340124 0.359373  
H 0.459870 0.341971 0.357852  
H -0.270838 0.494052 0.428463

PbI3-c, unconstrained optimization

a 6.32217490 alpha 88.584465  
b 6.19709604 beta 92.815823  
c 6.37790877 gamma 88.217428  
Pb 1.271555482731E-02 -3.535442795481E-03 3.965632303378E-02  
I -4.845153412397E-01 6.095592821410E-03 -2.719740685473E-03  
I -2.424422510490E-02 4.963281563581E-01 -3.535859574524E-02  
I 7.082661554633E-02 -7.722102381113E-03 -4.877475900023E-01  
N 4.509582620841E-01 -4.882202011204E-01 -3.387598401004E-01  
C -4.500040587209E-01 4.847057183614E-01 4.566452867998E-01  
H 2.972149422163E-01 -4.293695887284E-01 -3.577226541282E-01  
H -4.681687915615E-01 -3.814714749393E-01 -2.461309543111E-01  
H 4.497196213025E-01 3.673388168442E-01 -2.550075486376E-01  
H -4.548618200951E-01 -3.590899062387E-01 3.734051755640E-01  
H 4.608011791770E-01 3.671671931732E-01 3.668949251949E-01  
H -2.864945252739E-01 4.264830980288E-01 4.872615472722E-01

PbI3-t, unconstrained optimization

a 8.43865375 alpha 85.448026  
b 7.79704572 beta 89.960109  
c 11.90148590 gamma 90.004073  
Pb -1.608681759094E-02 -3.519984351563E-03 1.315280784427E-02  
Pb -4.839518620181E-01 4.965043930970E-01 1.366470818820E-02  
Pb 1.542079041023E-02 -3.359438586540E-03 -4.868533136542E-01  
Pb 4.833428362911E-01 4.966330122075E-01 -4.864521404358E-01  
Br 1.500340335724E-02 2.228080564862E-02 2.645778116141E-01  
Br -1.591836986833E-02 2.223876901193E-02 -2.353662345480E-01  
Br 4.837536437023E-01 -4.774962763440E-01 2.652750363364E-01  
Br -4.847327803644E-01 -4.773584314365E-01 -2.347333931246E-01  
Br 2.278355714139E-01 -2.772663111436E-01 1.658175418330E-02  
Pb -1.564100439261E-01 3.503947363083E-01 2.895734259311E-03  
Br 2.722884284974E-01 2.230295853541E-01 1.680516677283E-02  
Br -3.433806661813E-01 -1.494478010295E-01 3.461656115596E-03  
Br -2.730256199080E-01 2.229601699459E-01 -4.831905869961E-01  
Br 3.428167217609E-01 -1.492609779606E-01 -4.965835030865E-01  
Br -2.285454699040E-01 -2.770475872109E-01 -4.833630851318E-01  
Br 1.560042868903E-01 3.502366147798E-01 -4.970757685152E-01  
N 7.615048957181E-02 4.531140695892E-01 2.246664172511E-01  
C -6.73338599407E-02 -4.624569906122E-01 2.662305430423E-01  
H 1.267481382080E-01 -4.750795241978E-01 1.572259348537E-01  
H 1.592371820190E-01 4.358137579202E-01 2.875384719283E-01  
H 5.002142268762E-02 3.334335308829E-01 1.992792946331E-01  
H -1.190511631569E-01 4.546068992791E-01 3.347435600646E-01  
H -3.349198755013E-02 -3.395119742431E-01 2.967130365492E-01  
H -1.509873126103E-01 -4.424963452318E-01 1.967119736514E-01  
N 4.227536453832E-01 -4.644119255469E-02 2.250101787470E-01  
C -4.337150617607E-01 3.811981347413E-02 2.662988766154E-01  
H 3.708761019896E-01 2.637985080061E-02 1.585912389312E-01  
H 4.492410692270E-01 -1.650611462456E-01 1.981285181203E-01  
H 3.407507352325E-01 -6.587853410380E-02 2.885310190261E-01  
H -3.805801792330E-01 -4.587610146654E-02 3.336128242256E-01  
H -3.511209348410E-01 6.041979151559E-02 1.962396631603E-01  
H -4.679205744626E-01 1.598326312310E-01 2.983755149825E-01  
N -7.700694086996E-02 4.536271723451E-01 -2.753337131640E-01  
C 6.669727762172E-02 -4.620459118487E-01 -2.341085794572E-01  
H -1.287300644105E-01 -4.735678590354E-01 -3.418510943458E-01  
H -5.071546059178E-02 3.348511805307E-01 -3.020995216470E-01  
H -1.591259369720E-01 4.345277255189E-01 -2.118399533502E-01  
H 1.197639951155E-01 4.539097282733E-01 -1.667705217502E-01  
H 1.492749844964E-01 -4.399637821871E-01 -3.041966689449E-01  
H 3.272574354024E-02 -3.401855763664E-01 -2.021175112454E-01

N -4.237900326404E-01 -4.681418235906E-02 -2.749725607435E-01  
C 4.329724041640E-01 3.800205041394E-02 -2.333232759102E-01  
H -3.737296749428E-01 2.428198091427E-02 -3.429442780106E-01  
H -3.401734672637E-01 -6.322774247858E-02 -2.123872082209E-01  
H -4.500455110699E-01 -1.669969060082E-01 -2.995195629410E-01  
H 3.819316703952E-01 -4.414290171247E-02 -1.641420693686E-01  
H 4.669839008508E-01 1.614857246573E-01 -2.037353930122E-01  
H 3.486857014766E-01 5.685150024198E-02 -3.025325006047E-01

PbBr3-c, unconstrained optimization

a 5.96447237 alpha 90.349905  
b 5.77117435 beta 91.294961  
c 5.88224848 gamma 90.685044  
Pb 1.355417081773E-02 -4.861815629931E-04 3.381241657654E-02  
Br -4.838365698323E-01 -5.760749740540E-03 -3.556776655431E-03  
Br -4.701234851793E-02 4.987491380980E-01 -3.220025212523E-02  
Br 8.521296561525E-02 1.070253791327E-03 -4.734326234436E-01  
N 4.399465065975E-01 4.932336118343E-01 -3.285187077022E-01  
C -4.450199164325E-01 4.981373208612E-01 4.508223284133E-01  
H 2.690449497423E-01 4.780796803237E-01 -3.488321496160E-01  
H 4.724818746012E-01 -3.574182884087E-01 -2.356586558306E-01  
H 4.908781695535E-01 3.545077526199E-01 -2.315319588759E-01  
H 4.965835657923E-01 -3.521095922517E-01 3.550990447737E-01  
H -4.846664704826E-01 3.376392440809E-01 3.588130337172E-01  
H -2.649216520890E-01 -4.872127939405E-01 4.847727396032E-01

PbBr3-t, unconstrained optimization

a 8.43865375 alpha 85.448026  
b 7.79704572 beta 89.960109  
c 11.90148590 gamma 90.004073  
Pb -1.608681759094E-02 -3.519984351563E-03 1.315280784427E-02  
Pb -4.839518620181E-01 4.965043930970E-01 1.366470818820E-02  
Pb 1.542079041023E-02 -3.359438586540E-03 -4.868533136542E-01  
Pb 4.833428362911E-01 4.966330122075E-01 -4.864521404358E-01  
Br 1.500340335724E-02 2.228080564862E-02 2.645778116141E-01  
Br -1.591836986833E-02 2.223876901193E-02 -2.353662345480E-01  
Br 4.837536437023E-01 -4.774962763440E-01 2.652750363364E-01  
Br -4.847327803644E-01 -4.773584314365E-01 -2.347333931246E-01  
Br 2.278355714139E-01 -2.772663111436E-01 1.658175418330E-02  
Br -1.564100439261E-01 3.503947363083E-01 2.895734259311E-03  
Br 2.722884284974E-01 2.230295853541E-01 1.680516677283E-02  
Br -3.433806661813E-01 -1.494478010295E-01 3.461656115596E-03  
Br -2.730256199080E-01 2.229601699459E-01 -4.831905869961E-01  
Br 3.428167217609E-01 -1.492609779606E-01 -4.965835030865E-01  
Br -2.285454699040E-01 -2.770475872109E-01 -4.833630851318E-01  
Br 1.560042868903E-01 3.502366147798E-01 -4.970757685152E-01  
N 7.615048957181E-02 4.531140695892E-01 2.246664172511E-01  
C -6.733338599407E-02 -4.624569906122E-01 2.662305430423E-01  
H 1.267481382080E-01 -4.750795241978E-01 1.572259348537E-01  
H 1.592371820190E-01 4.358137579202E-01 2.875384719283E-01  
H 5.002142268762E-02 3.334335308829E-01 1.992792946331E-01  
H -1.190511631569E-01 4.546068992791E-01 3.347435600646E-01  
H -3.349198755013E-02 -3.395119742431E-01 2.967130365492E-01  
H -1.509873126103E-01 -4.424963452318E-01 1.967119736514E-01  
N 4.227536453832E-01 -4.644119255469E-02 2.250101787470E-01  
C -4.337150617607E-01 3.811981347413E-02 2.662988766154E-01  
H 3.708761019896E-01 2.637985080061E-02 1.585912389312E-01  
H 4.492410692270E-01 -1.650611462456E-01 1.981285181203E-01  
H 3.407507352325E-01 -6.587853410380E-02 2.885310190261E-01  
H -3.805801792330E-01 -4.587610146654E-02 3.336128242256E-01  
H -3.511209348410E-01 6.041979151559E-02 1.962396631603E-01  
H -4.679205744626E-01 1.598326312310E-01 2.983755149825E-01  
N -7.700694086996E-02 4.536271723451E-01 -2.753337131640E-01  
C 6.669727762172E-02 -4.620459118487E-01 -2.341085794572E-01  
H -1.287300644105E-01 -4.735678590354E-01 -3.418510943458E-01  
H -5.071546059178E-02 3.348511805307E-01 -3.020995216470E-01  
H -1.591259369720E-01 4.345277255189E-01 -2.118399533502E-01  
H 1.197639951155E-01 4.539097282733E-01 -1.667705217502E-01  
H 1.492749844964E-01 -4.399637821871E-01 -3.041966689449E-01  
H 3.272574354024E-02 -3.401855763664E-01 -2.021175112454E-01  
N -4.237900326404E-01 -4.681418235906E-02 -2.749725607435E-01  
C 4.329724041640E-01 3.800205041394E-02 -2.333232759102E-01  
H -3.737296749428E-01 2.428198091427E-02 -3.429442780106E-01  
H -3.401734672637E-01 -6.322774247858E-02 -2.123872082209E-01  
H -4.500455110699E-01 -1.669969060082E-01 -2.995195629410E-01  
H 3.819316703952E-01 -4.414290171247E-02 -1.641420693686E-01  
H 4.669839008508E-01 1.614857246573E-01 -2.037353930122E-01

H 3.486857014766E-01 5.685150024198E-02 -3.025325006047E-01

PbCl3-c, unconstrained optimization

a 5.70612583 alpha 90.017465

b 5.47759452 beta 88.900074

c 5.62095787 gamma 90.036249

Pb 7.657462002782E-03 -6.743817175098E-04 4.718132080186E-02

Cl -4.886917770026E-01 -9.174980993197E-04 -1.057690293611E-02

Cl -6.116281690667E-02 4.992745583037E-01 -4.261306984132E-02

Cl 8.892642022943E-02 -8.136592053768E-04 -4.577551769271E-01

N 4.378247402566E-01 4.990376262231E-01 -3.177364675208E-01

C -4.452628390779E-01 4.993087587124E-01 4.453506041093E-01

H 2.583348050656E-01 4.987879891758E-01 -3.275734428964E-01

H 4.837627639927E-01 -3.483910389967E-01 -2.215802343100E-01

H 4.839785767175E-01 3.465256888672E-01 -2.217953207187E-01

H -4.983598081508E-01 -3.368980164560E-01 3.503820188030E-01

H -4.981153540962E-01 3.354445073763E-01 3.501348111177E-01

H -2.563981730302E-01 4.995604658161E-01 4.705608603184E-01

## 12. References

1. T. Ishihara, *J. Lumin.*, 1994, **61**, 269–274.
2. G. C. Papavassiliou and I. B. Koutselas, *Synth. Met.*, 1995, **71**, 1713–1714.
3. G. C. Papavassiliou, G. A. Mousdis, and G. C. Anyfantis, *Z. Naturforsch B*, 2010, **65**, 516–520.
4. J. Even, L. Pedesseau, J.-M. Jancu, and C. Katan, *J. Phys. Chem. Lett.*, 2013, **4**, 2999–3005.
5. F. Brivio, K. T. Butler, A. Walsh, and M. van Schilfgaarde, *Phys. Rev. B*, 2014, **89**, 155204.
6. E. Mosconi, A. Amat, K. Nazeeruddin, M. Gra, and F. De Angelis, *J. Phys. Chem. C*, 2013, **117**, 13902–13913.
7. G. Giorgi, J. Fujisawa, H. Segawa, and K. Yamashita, *J. Phys. Chem. Lett.*, 2013, **4**, 4213–4216.
8. P. Umari, E. Mosconi, and F. De Angelis, *Sci. Rep.*, 2014, **4**, 4467.
9. M. Hirasawa, T. Ishihara, T. Goto, K. Uchida, and N. Miura, *Phys. B*, 1994, **201**, 427–430.
10. F. Brivio, A. B. Walker, and A. Walsh, *APL Mat.*, 2013, **1**, 042111.
11. A. Poglitsch and D. Weber, *J. Chem. Phys.*, 1987, **87**, 6373–6378.
